# Supplementary material
Source: PubMed Central journal article supplement (PMC5426551)
Supplement: NIHMS72591-supplement-Supplementary_tables.pdf [file NIHMS72591-supplement-Supplementary_tables.pdf]

Supplemental Table 1. Associations between *FKBP5* rs1360780, *FKBP5* methylation factor 1, disorganized behavior, and extreme insensitivity on cortisol reactivity during the Strange Situation Procedure ( $N = 298$ )

| Model                                                             | <i>B</i> (95% <i>CI</i> ) | $\beta$ |
|-------------------------------------------------------------------|---------------------------|---------|
| <i>FKBP5</i> rs1360780                                            | 1.05 (0.15; 1.95)         | .12*    |
| <i>FKBP5</i> methylation factor 1                                 | -23.11 (-55.80; 9.59)     | -.10    |
| Disorganized behavior                                             | -0.10 (-0.42; 0.23)       | -.03    |
| Extreme insensitivity                                             | -0.26 (-1.06; 0.53)       | -.04    |
| <i>FKBP5</i> rs1360780 $\times$ <i>FKBP5</i> methylation factor 1 | 35.39 (-3.35; 74.13)      | .10     |
| <i>FKBP5</i> rs1360780 $\times$ disorganized behavior             | 0.16 (-0.37; 0.68)        | .03     |
| <i>FKBP5</i> methylation factor 1 $\times$ disorganized behavior  | -7.26 (-21.36; 6.83)      | -.06    |
| <i>FKBP5</i> rs1360780 $\times$ extreme insensitivity             | -0.86 (-2.19; 0.48)       | -.07    |
| <i>FKBP5</i> methylation factor 1 $\times$ extreme insensitivity  | -2.83 (-30.48; 24.82)     | -.01    |
| Disorganized behavior $\times$ extreme insensitivity              | -0.22 (-0.77; 0.33)       | -.05    |

*Note.* *FKBP5* rs1360780: CC = 0, CT = 1, TT = 2. Analyses are adjusted for technical methylation covariates, cell type proportions of DNA methylation sample, infant age at assessment of SSP, infant gender, educational level of the mother and maternal smoking during pregnancy. The statistics are derived from the final block of the regression model. None of the possible three-way interactions was significantly associated with cortisol reactivity.

\*  $p < .05$ .

Supplemental Table 2. Associations between *FKBP5* rs1360780, *FKBP5* methylation factor 2, disorganized behavior, and extreme insensitivity on cortisol reactivity during the Strange Situation Procedure ( $N = 298$ )

| Model                                                             | <i>B</i> (95% <i>CI</i> ) | $\beta$ |
|-------------------------------------------------------------------|---------------------------|---------|
| <i>FKBP5</i> rs1360780                                            | 1.02 (0.11; 1.93)         | .12*    |
| <i>FKBP5</i> methylation factor 2                                 | 3.16 (-34.33; 40.64)      | .02     |
| Disorganized behavior                                             | -0.04 (-0.36; 0.27)       | -.02    |
| Extreme insensitivity                                             | -0.22 (-0.98; 0.55)       | -.03    |
| <i>FKBP5</i> rs1360780 $\times$ <i>FKBP5</i> methylation factor 2 | 7.68 (-18.39; 33.75)      | .03     |
| <i>FKBP5</i> rs1360780 $\times$ disorganized behavior             | 0.11 (-0.42; 0.65)        | .02     |
| <i>FKBP5</i> methylation factor 2 $\times$ disorganized behavior  | 1.66 (-6.96; 10.27)       | .02     |
| <i>FKBP5</i> rs1360780 $\times$ extreme insensitivity             | -0.84 (-2.22; 0.55)       | -.07    |
| <i>FKBP5</i> methylation factor 2 $\times$ extreme insensitivity  | 3.84 (-19.22; 26.91)      | .02     |
| Disorganized behavior $\times$ extreme insensitivity              | -0.27 (-0.81; 0.27)       | -.06    |

*Note.* *FKBP5* rs1360780: CC = 0, CT = 1, TT = 2. Analyses are adjusted for technical methylation covariates, cell type proportions of DNA methylation sample, infant age at assessment of SSP, infant gender, educational level of the mother and maternal smoking during pregnancy. The statistics are derived from the final block of the regression model. None of the possible three-way interactions was significantly associated with cortisol reactivity.

\*  $p < .05$ .
